# Supplementary material for: Cultural evolution of conformity and anticonformity
Source: PubMed Central journal article supplement — Proc Natl Acad Sci U S A. 2020 May 27;117(24):13603–14. doi: 10.1073/pnas.2004102117 (PMC7306811; doi:10.1073/pnas.2004102117), 2020-05-27
Supplement: pnas.2004102117.sapp.pdf [file pnas.2004102117.sapp.pdf]

1

2 **Supplementary Information for**  
3 **Cultural evolution of conformity and anti-conformity**

4 **Kaleda Krebs Denton, Yoav Ram, Uri Liberman, and Marcus W. Feldman**

5 **Marcus W. Feldman.**

6 **E-mail: [mfeldman@stanford.edu](mailto:mfeldman@stanford.edu)**

7 **This PDF file includes:**

8     Supplementary text

9     Figs. S1 to S4

10    Table S1

## 11 Supporting Information Text

### 12 Supplementary Information A: Proof of Result 1

13 In defining  $F_n(p)$  for all  $j = k, k+1, \dots, n$  we take  $j \geq \frac{n}{2} + 1$  when  $n$  is even and  $j \geq \frac{n+1}{2}$  when  $n$  is odd. Therefore  $2j > n$ ,  
 14 and so

$$15 \quad p^j(1-p)^{n-j} - p^{n-j}(1-p)^j = p^{n-j}(1-p)^{n-j} [p^{2j-n} - (1-p)^{2j-n}]. \quad [A1]$$

It is easily seen that for all  $k = 1, 2, \dots$ ,

$$p^{k+1} - (1-p)^{k+1} = p^k - (1-p)^k - p(1-p) [p^{k-1} - (1-p)^{k-1}]. \quad [A2]$$

Also

$$p - (1-p) = p^2 - (1-p)^2 = (2p-1). \quad [A3]$$

Therefore, by induction, we deduce that  $[p^k - (1-p)^k]$  for all  $k = 1, 2, \dots$  is of the form  $(2p-1)$  multiplied by a polynomial in  $p(1-p)$ . As

$$F_n(p) = \sum_{j=k}^n \frac{D(j)}{n} \binom{n}{j} [p(1-p)]^{n-j} [p^{2j-n} - (1-p)^{2j-n}], \quad [A4]$$

16 we conclude that  $F_n(p) = (2p-1)G_n(p(1-p))$ , and since  $F_n(0) = F_n(1) = 0$  we have  $G_n(0) = 0$ . Note that since  
 17  $D(n) = D(0) = 0$ ,  $p(1-p)$  is a factor of  $F_n(p)$ .

### 18 Supplementary Information B: Proof of Result 2

19 Since there is symmetry in the model between the two cultural variants  $A$  and  $B$ , we analyze only the stability of  $p^* = 0$ ,  
 20 namely fixation in type  $B$ .

Let  $p = \varepsilon$ . Then from eq. (6), as  $D(0) = D(n) = 0$ , we have

$$\varepsilon' = \varepsilon + \sum_{j=1}^{n-1} \frac{D(j)}{n} \binom{n}{j} \varepsilon^j (1-\varepsilon)^{n-j}. \quad [B1]$$

Therefore the linear approximation of [B1] in terms of  $\varepsilon$  is

$$\varepsilon' = \varepsilon + \frac{D(1)}{n} \binom{n}{1} \varepsilon = \varepsilon [1 + D(1)]. \quad [B2]$$

21 Hence if  $D(1) < 0$ , then  $p^* = 0$  is locally stable, whereas if  $D(1) > 0$ ,  $p^* = 0$  is not locally stable.

For the stability of  $p^* = \frac{1}{2}$ , we use eq. [A4], written as

$$p' = p + p(1-p) \sum_{j=k}^{n-1} \frac{D(j)}{n} \binom{n}{j} [p(1-p)]^{n-j-1} [p^{2j-n} - (1-p)^{2j-n}], \quad [B3]$$

22 where  $k = \frac{n}{2} + 1$  when  $n$  is even and  $k = \frac{n+1}{2}$  when  $n$  is odd.

Let  $p = \frac{1}{2} + \varepsilon$ ,  $1-p = \frac{1}{2} - \varepsilon$ ,  $p(1-p) = \frac{1}{4} - \varepsilon^2$ , and  $p' = \frac{1}{2} + \varepsilon'$ . Then

$$\varepsilon' = \varepsilon + \left(\frac{1}{4} - \varepsilon^2\right) \sum_{j=k}^{n-1} \frac{D(j)}{n} \binom{n}{j} \left(\frac{1}{4} - \varepsilon^2\right)^{n-j-1} \left[ \left(\frac{1}{2} + \varepsilon\right)^{2j-n} - \left(\frac{1}{2} - \varepsilon\right)^{2j-n} \right]. \quad [B4]$$

Expand  $\left(\frac{1}{2} \pm \varepsilon\right)^{2j-n}$ . Then since  $(2j-n) \geq 1$ , up to non-linear terms in  $\varepsilon$ , we have

$$\left(\frac{1}{2} \pm \varepsilon\right)^{2j-n} \simeq \left(\frac{1}{2}\right)^{2j-n} \pm (2j-n) \left(\frac{1}{2}\right)^{2j-n-1} \varepsilon. \quad [B5]$$

So up to non-linear terms in  $\varepsilon$ ,

$$\left(\frac{1}{2} + \varepsilon\right)^{2j-n} - \left(\frac{1}{2} - \varepsilon\right)^{2j-n} \simeq 2(2j-n) \left(\frac{1}{2}\right)^{2j-n-1} \varepsilon. \quad [B6]$$

Thus the linear approximation of [B4] is

$$\varepsilon' = \varepsilon + \frac{\varepsilon}{4} \sum_{j=k}^{n-1} \frac{D(j)}{n} \binom{n}{j} \left(\frac{1}{4}\right)^{n-j-1} \cdot 2(2j-n) \left(\frac{1}{2}\right)^{2j-n-1}, \quad [B7]$$

or

$$\varepsilon' = \varepsilon \left[ 1 + \left(\frac{1}{2}\right)^{n-2} \sum_{j=k}^{n-1} \frac{D(j)}{n} (nj) (2j-n) \right]. \quad [B8]$$

Therefore, if

$$-2^{n-1} < \sum_{j=k}^{n-1} \frac{D(j)}{n} \binom{n}{j} (2j-n) < 0, \quad [B9]$$

23 then  $p^* = \frac{1}{2}$  is locally stable.

24 **Supplementary Information C: Proof of Result 7**

25 When  $\mu = 0$ ,  $\mathbf{L}_0$  in (41) is the diagonal matrix whose  $N$  diagonal elements are  $(1 + s_i)[1 - D_i(n - 1)]$  for  $i = 1, 2, \dots, N$ .  
 26 Therefore, these are the  $N$  eigenvalues of  $\mathbf{M}_0$ , and  $\rho_0(0)$ , the largest positive eigenvalue, is  $\max_{1 \leq i \leq N} \left\{ (1 + s_i)[1 - D_i(n - 1)] \right\}$ .

When  $\mu = \frac{N-1}{N}$ , we also have  $(1 - \mu) = \frac{\mu}{N-1} = \frac{1}{N}$ , and (41) reduces to

$$\varepsilon'_i = \frac{1}{N}(1 + s_i)[1 - D_i(n - 1)]\varepsilon_i + \frac{1}{N} \sum_{j \neq i} (1 + s_j)[1 - D_j(n - 1)]\varepsilon_j. \quad [C1]$$

Therefore, when  $\mu = \frac{N-1}{N}$ , if  $\underline{\varepsilon} = (1, 1, \dots, 1)$  from [C1] we have

$$\varepsilon'_i = \frac{1}{N} \sum_{j=1}^N (1 + s_j)[1 - D_j(n - 1)]\varepsilon_j \quad \text{for } i = 1, 2, \dots, N.$$

Hence, in this case  $\mathbf{L}_0(1, \dots, 1) = \frac{1}{N} \sum_{j=1}^N (1 + s_j)[1 - D_j(n - 1)](1, \dots, 1)$ , and by the Perron-Frobenius theorem

$$\rho\left(\frac{N-1}{N}\right) = \frac{1}{N} \sum_{j=1}^N (1 + s_j)[1 - D_j(n - 1)]. \quad [C2]$$

27 A similar proof applies to  $\rho(0)$  and  $\rho\left(\frac{N-1}{N}\right)$ .

28 **Supplementary Information D: Two Populations, No Selection,  $D_2 = -D_1$**

We saw in eq. (63) that the recursions (57) had equilibria of the form  $(0, 0)$ ,  $(1, 1)$ , and  $(\frac{1}{2}, \frac{1}{2})$ . However, when  $p_2 \neq p_1$  at equilibrium, we have to solve  $Q(p_2) = 0$  where  $Q(p_2)$  is given by eq. (62). Solving  $Q(p_2) = 0$  gives

$$p_2 = \frac{1}{4} \left[ (3 - 2p_1) \pm \sqrt{12p_1(1 - p_1) + 1} \right]. \quad [D1]$$

As we need  $0 < p_2 < 1$ , we actually have

$$\begin{aligned} 0 < p_1 < \frac{1}{2} &\implies p_2 = \frac{1}{4} \left[ (3 - 2p_1) - \sqrt{12p_1(1 - p_1) + 1} \right] \\ \frac{1}{2} < p_1 < 1 &\implies p_2 = \frac{1}{4} \left[ (3 - 2p_1) + \sqrt{12p_1(1 - p_1) + 1} \right]. \end{aligned} \quad [D2]$$

To classify these possible equilibria we have to use [D2] in (58a) and solve for  $p_1$  subject to  $0 < p_1 < 1$ . In fact, substituting [D2] into (58a) and using  $D_2 = -D_1$  with (60), we must solve the equation

$$F(p_1) = D_1 p_1 (1 - p_1) (2p_1 - 1) (1 - 2\mu) - \mu p_1 + \frac{\mu}{4} \left[ 3 - 2p_1 \pm \sqrt{12p_1(1 - p_1) + 1} \right], \quad [D3]$$

where  $0 < p_1 < 1$ . Observe that

$$\begin{aligned} F(0) &= \frac{\mu}{4} [3 \pm 1] > 0, \\ F\left(\frac{1}{2}\right) &= -\frac{\mu}{2} + \frac{\mu}{4} [2 \pm 2], \\ F(1) &= -\mu + \frac{\mu}{4} [1 \pm 1]. \end{aligned} \quad [D4]$$

29 Hence, if  $p_2 = \frac{1}{4} \left[ (3 - 2p_1) - \sqrt{12p_1(1 - p_1) + 1} \right]$  as  $F(0) > 0$  and  $F\left(\frac{1}{2}\right) < 0$ , and there exists  $p_1^*$  with  $0 < p_1^* < \frac{1}{2}$  such  
 30 that  $F(p_1^*) = 0$  in accordance with [D2], in which case also  $0 < p_2^* < \frac{1}{2}$ . If  $p_2 = \frac{1}{4} \left[ (3 - 2p_1) + \sqrt{12p_1(1 - p_1) + 1} \right]$ , then  
 31 as  $F\left(\frac{1}{2}\right) > 0$  and  $F(1) < 0$  we have a solution  $p_1^*$  of  $F(p_1) = 0$  satisfying  $\frac{1}{2} < p_1^* < 1$  following [D2], and also  $\frac{1}{2} < p_2^* < 1$ .  
 32 Therefore, in addition to  $(0, 0)$ ,  $(\frac{1}{2}, \frac{1}{2})$ ,  $(1, 1)$  two more polymorphic equilibria exist:  $(p_1^*, p_2^*)$  with  $0 < p_1^*, p_2^* < \frac{1}{2}$ , and  $(p_1^{**}, p_2^{**})$   
 33 with  $\frac{1}{2} < p_1^{**}, p_2^{**} < 1$ . Simulations have shown that these equilibria can be stable.

### 34 **Supplementary Information E: Two Populations, No Selection, $D_2 = D_1$**

If  $D_2 = D_1$ , then from (59),

$$p_1(1 - p_1)(2p_1 - 1) = -p_2(1 - p_2)(2p_2 - 1). \quad [E1]$$

Let  $z = 1 - p_2$ , then [E1] becomes

$$p_1(1 - p_1)(2p_1 - 1) = z(1 - z)(2z - 1). \quad [E2]$$

Using the above analysis, we conclude that either  $1 - p_2 = z = p_1$  or

$$(1 - p_2) = z = \frac{1}{4} \left[ (3 - 2p_1) \pm \sqrt{12p_1(1 - p_1) + 1} \right] \quad [E3]$$

35 with the same specification as in eq. [D2].

Observe that if  $p_1 = 0$  then from (58)  $z = 1$  and  $p_2 = 0$ , and when  $p_1 = 1$  then  $z = 0$  and  $p_2 = 1$ . Thus  $(0, 0)$  and  $(1, 1)$  are possible equilibria. If  $p_2 = 1 - p_1$  ( $z = p_1$ ), using (58a) and [E1], we have

$$D_1 p_1(1 - p_1)(2p_1 - 1)(1 - 2\mu) + \mu(1 - 2p_1) = 0. \quad [E4]$$

Hence, if  $p_1 = \frac{1}{2}$ , then also  $p_2 = \frac{1}{2}$  and we have the equilibrium point  $(\frac{1}{2}, \frac{1}{2})$ . Otherwise

$$D_1 p_1(1 - p_1)(1 - 2\mu) = \mu \quad [E5]$$

and

$$p_1(1 - p_1) = \frac{\mu}{D_1(1 - 2\mu)}. \quad [E6]$$

36 We assume that  $0 < \mu < \frac{1}{2}$ . Solutions to (E5) exist if  $0 < \frac{\mu}{D_1(1 - 2\mu)} < \frac{1}{4}$  or if  $D_1 > \frac{4\mu}{1 - 2\mu}$ . Since we also require  $-2 < D_1 < 1$ ,  
 37 we must have  $\frac{4\mu}{1 - 2\mu} < 1$  or  $\mu < \frac{1}{6}$ . Thus we can have two polymorphic equilibria  $(p_1^*, 1 - p_1^*)$  or  $(1 - p_1^*, p_1^*)$ , both satisfying [E6]  
 38 and  $p_2^* = 1 - p_1^*$ , provided  $\mu < \frac{1}{6}$ .

To check the local stability of these equilibria, the linear approximation of our transformation (57a) and (57b) near  $(p_1^*, 1 - p_1^*)$  is given by

$$\begin{bmatrix} \varepsilon_1' \\ \varepsilon_2' \end{bmatrix} = \begin{bmatrix} (1 - \mu)A & \mu A \\ \mu A & (1 - \mu)A \end{bmatrix} \begin{bmatrix} \varepsilon_1 \\ \varepsilon_2 \end{bmatrix}, \quad [E7]$$

where

$$A = 1 + D_1 [6p_1^* - 6(p_1^*)^2 - 1]. \quad [E8]$$

Using [E6], [E8] reduces to

$$A = 1 - D_1 + \frac{6\mu}{1 - 2\mu}. \quad [E9]$$

39 The eigenvalues of the matrix in [E7] determining the stability of either  $(p_1^*, 1 - p_1^*)$  or  $(1 - p_1^*, p_1^*)$  are  $A$  and  $(1 - 2\mu)A$ .  
 40 Since  $A > 0$  and  $D_1 < 1$ , the largest eigenvalue is  $A$  and it is smaller than 1 if  $D_1 > \frac{6\mu}{1 - 2\mu}$ . Thus we need  $\mu < \frac{1}{8}$  for these  
 41 equilibria to be stable.

42 To sum up, when  $\mu < \frac{1}{8}$  we have two polymorphic equilibria both of which are stable when  $D_1 > \frac{6\mu}{1 - 2\mu}$  and unstable if  
 43  $\frac{4\mu}{1 - 2\mu} < D_1 < \frac{6\mu}{1 - 2\mu}$ . An example with two such stable equilibria is shown in Figure S4. When  $0 < D_1 < \frac{4\mu}{1 - 2\mu}$  these equilibria  
 44 do not exist.

### 45 **Supplementary Information F: Two Populations: interaction of migration, selection, and conformity**

46 Consider the case  $s = 0.25$ ,  $D_1 = 0.21$ ,  $D_2 = 0.18$  with three role models. Here  $s/(1 + s) = 0.2$  so that in the absence of  
 47 migration, in subpopulation 1,  $p_1 = 0$  and  $p_1 = 1$  are both stable, while in subpopulation 2, only  $p_2 = 1$  is stable. Including  
 48 migration entails that  $(p_1, p_2) = (0, 0)$  becomes unstable and  $(p_1, p_2) = (1, 1)$  is locally stable.

49 Another interesting example of the effect of migration sets  $s = 0.25$ ,  $D_1 = -0.3$ , and  $D_2 = 0.05$ . In this case, population  
 50 1 would maintain a polymorphism in the absence of population 2 while population 2 would fix on  $p_2 = 1$  in the absence of  
 51 population 1. The fixation of  $B$ , namely  $(p_1, p_2) = (0, 0)$  is unstable for all  $\mu \in [0, \frac{1}{2}]$ , but fixation of  $A$ , namely  $(p_1, p_2) = (1, 1)$ ,  
 52 is stable for  $\mu > 0.0438$ . This suggests that if  $0 < \mu < 0.0438$ , the two-population system is able to maintain a polymorphism,  
 53 but greater migration (larger  $\mu$ ) results in the loss of type  $B$  from both populations. The delicacy of the interaction between  $s$ ,  
 54  $D_1$ , and  $D_2$  in determining the evolutionary dynamics is exemplified by changing  $D_1 = -0.3$  to  $D_1 = -0.5$ , in which case the  
 55 threshold for stability of  $(p_1, p_2) = (1, 1)$  changes from  $\mu > 0.0438$  to  $\mu > 0.3529$ . If  $D_1$  and  $D_2$  are kept at  $-0.3$  and  $0.05$ ,  
 56 respectively, but  $s$  is reduced from  $0.25$  to  $0.1$ , then fixation in  $A$ ,  $(p_1, p_2) = (1, 1)$ , is unstable for all  $\mu \in [0, \frac{1}{2}]$ , and fixation in  
 57  $B$ ,  $(p_1, p_2) = (0, 0)$ , is also unstable for all  $\mu \in [0, \frac{1}{2}]$ , suggesting that the polymorphism is stable for all legitimate values of  $\mu$ .

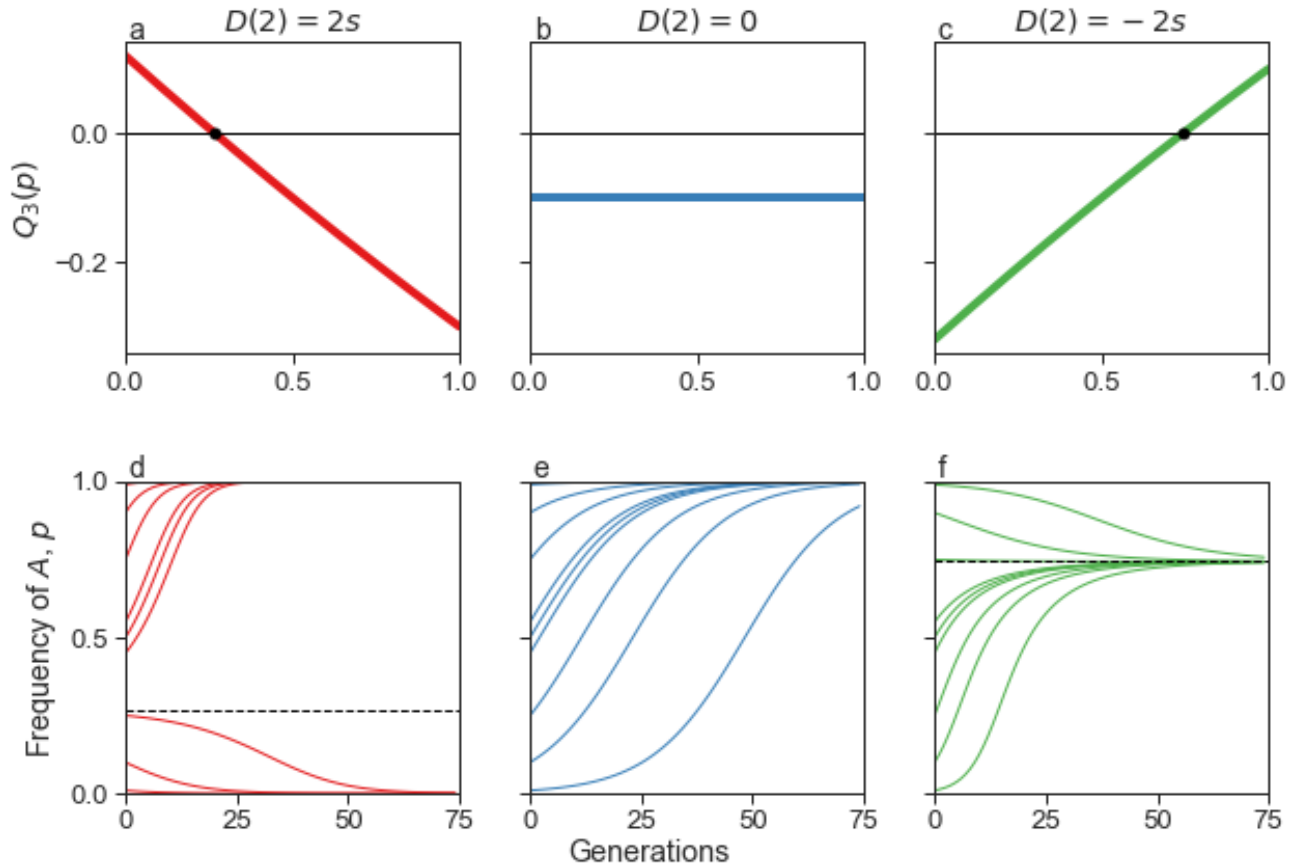

**Fig. S1.** Frequency-dependent bias with  $n = 3$ . The top row (a–c) shows the shape of  $Q_3(p)$  = in eq. (25) for three values of  $v = D(2)$ , the conformity coefficient: (a) conformity bias with  $D(2) = 2s > s/(1 + s)$ , which gives  $p^* < \frac{1}{2}$ , (b) unbiased transmission with  $D(2) = 0$ , (c) anti-conformity bias with  $D(2) = -2s$ , which gives  $p^* > \frac{1}{2}$ . The circles mark the value of the polymorphic equilibrium  $p^*$  (which solves  $Q_3(p) = 0$ ), if it exists. The bottom row (d–f) shows the frequency of variant  $A$  over time, with the dashed line denoting  $p^*$ . Different lines are for different initial frequencies of  $A$ . It can be seen that either type  $A$  or type  $B$  goes to fixation, with a larger domain of attraction for the favorable variant  $A$  when  $D(2) = 2s$ ; that  $A$  goes to fixation when  $D(2) = 0$  regardless of initial conditions; and that  $p^* > \frac{1}{2}$  is globally stable when  $D(2) = -2s$ , such that a polymorphism is maintained over the long term. Here phenotype  $A$  has a selective advantage of  $s = 0.1$ .

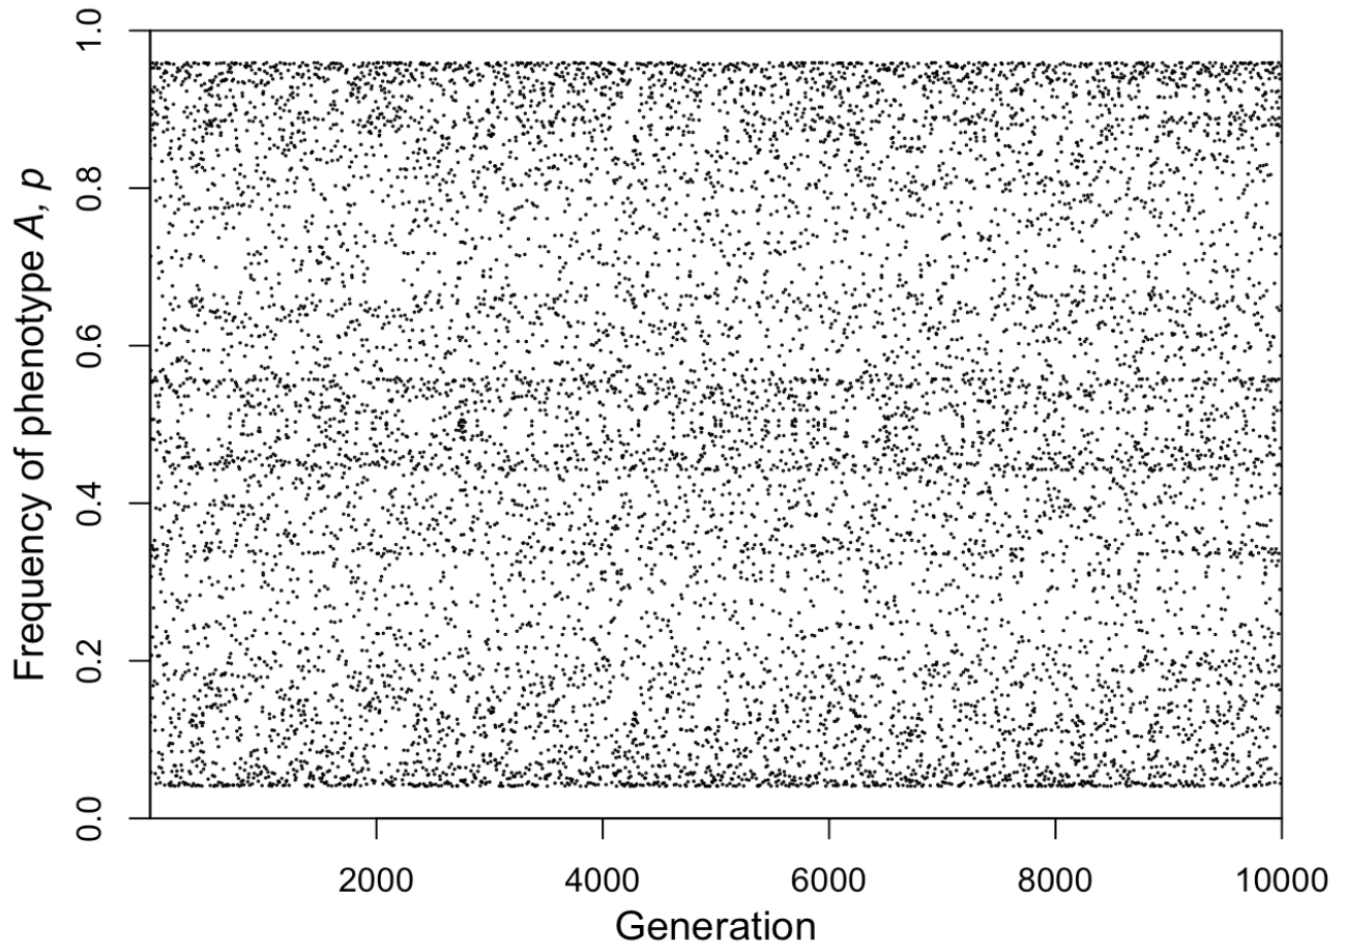

**Fig. S2.** The frequency of  $A$ ,  $p$  from Eq. [7], is plotted over time. The parameters are  $n = 14$  and  $D(j) = -j + 0.00001$ .

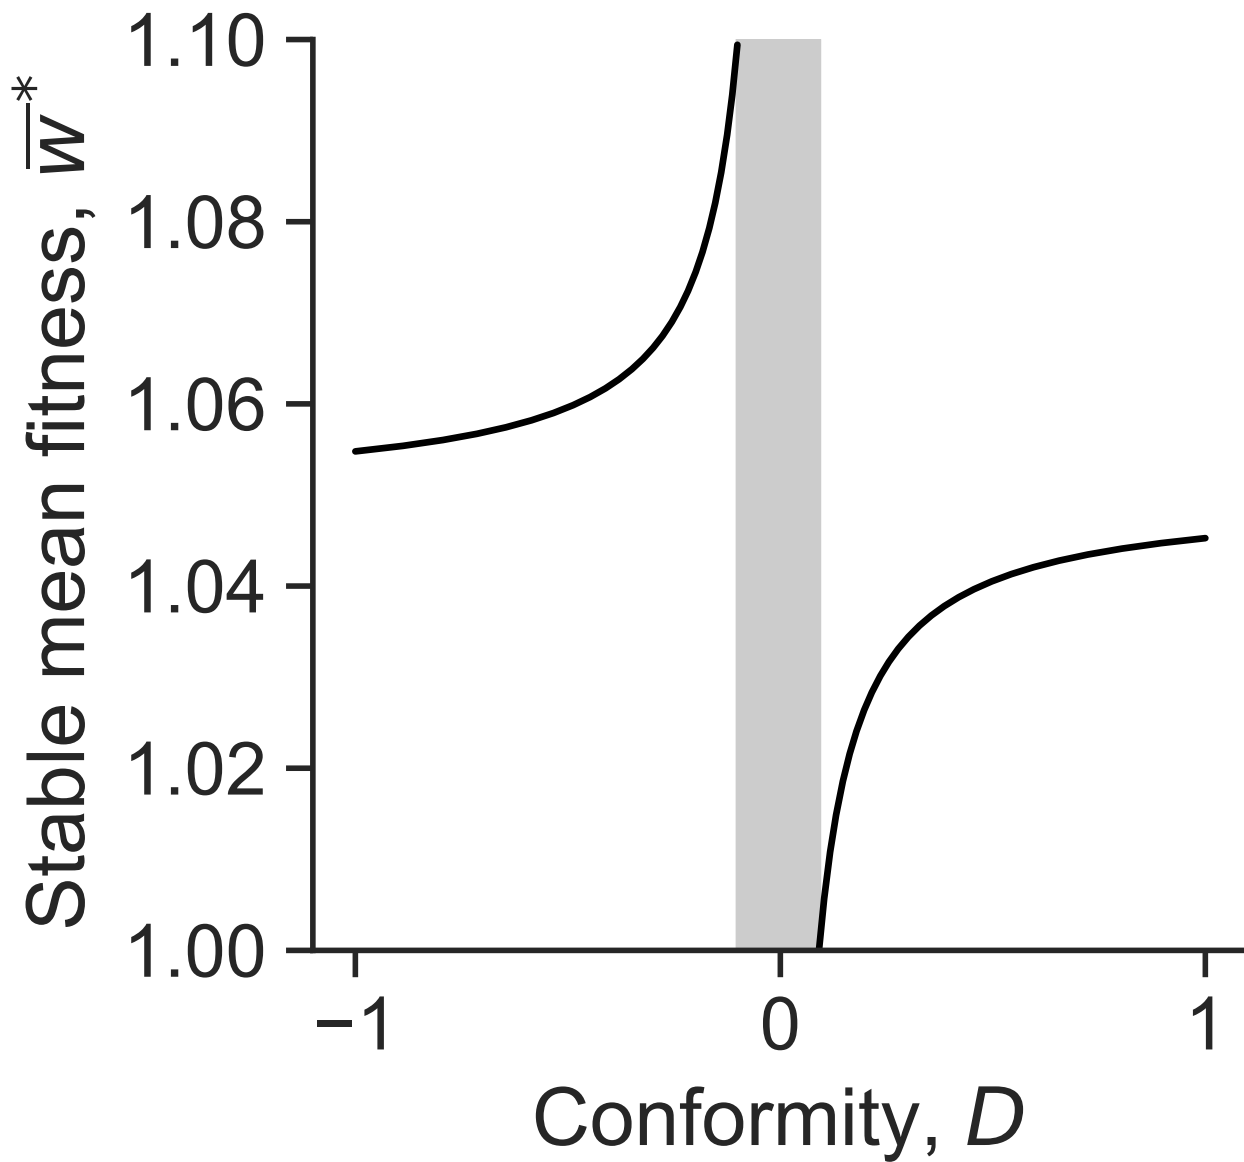

**Fig. S3.** Mean fitness increases with frequency-dependent bias. The figure shows the population mean fitness  $\bar{W}$  (eq. 24) at the protected polymorphism  $p^*$  (the solution to eq. 25, if it exists) as a function of the coefficients of conformity  $v$ . In the shaded area  $s < v < s/(1 + s)$  and  $p^*$  does not exist. Here,  $s = 0.1$ .

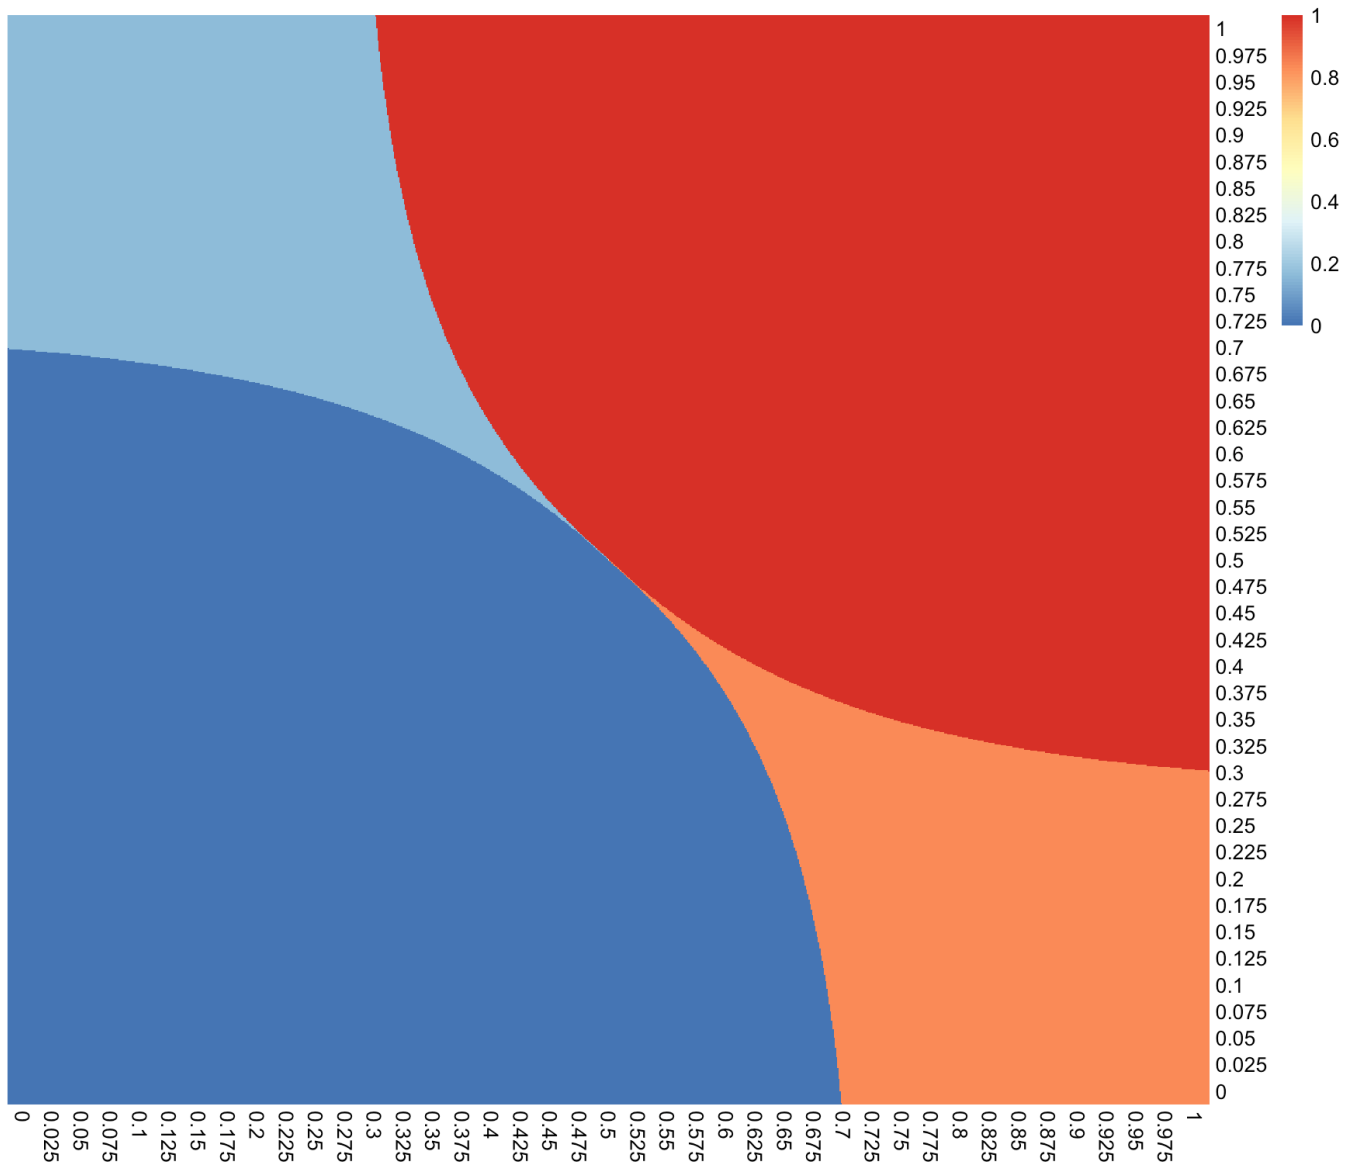

**Fig. S4.** There are two populations with equal conformity parameters  $D_1 = D_2 = 0.4$  and  $n = 3$ . There is no selection ( $s_1 = s_2 = 0$ ). Migration occurs between the two populations at rate  $\mu = 0.05$ . The  $x$ -axis is the initial frequency of variant  $A$  in population 1 and the  $y$ -axis is the initial frequency of variant  $A$  in population 2. The colors correspond to the frequency of variant  $A$  at equilibrium given the initial conditions. Red corresponds to fixation of  $A$ , dark blue corresponds to loss of  $A$ , and orange and light blue correspond to the polymorphic solutions of eq. (64).



**Table S1. Supplementary Table S1: Properties of  $\phi_n$** 

| $n$ | Lower Bound for $\phi_n$ | Dynamics Near Lower Bound      |
|-----|--------------------------|--------------------------------|
| 3   | 0                        | Converges to $p = \frac{1}{2}$ |
| 4   | -0.5                     | Converges to $p = \frac{1}{2}$ |
| 5   | -1.25                    | 2-generation cycles            |
| 6   | -1.5                     | 2-generation cycles            |
| 7   | -1.968750                | 2-generation cycles            |
| 8   | -2.062500                | 2-generation cycles            |
| 9   | -2.390625                | 4-generation cycles            |
| 10  | -2.421875                | Chaos                          |
| 11  | -2.685547                | Chaos                          |
| 12  | -2.695312                | 10-generation cycles           |
| 13  | -2.926270                | Chaos                          |
| 14  | -2.929199                | Chaos                          |
| 15  | -3.140259                | Chaos                          |
| 16  | -3.141113                | Chaos                          |
| 17  | -3.337952                | 70-generation cycles           |
| 18  | -3.338196                | Chaos                          |
| 19  | -3.523796                | Chaos                          |
| 20  | -3.523865                | Chaos                          |
